# Supplementary material for: Photochemical detoxification of Cr(vi) using iron and saccharic acid: insights from cytotoxic and genotoxic assays
Source: Royal Society of Chemistry journal article supplement (doi:10.1039/c8ew00216a), 2018-01-01
Supplement: c8ew00216a1.pdf [file c8ew00216a1.pdf]

## Supplementary Information

### Photochemical detoxification of Cr (VI) using iron and saccharic acid: Insights from cytotoxic and genotoxic assays

*Gokulakrishnan Subramanian<sup>a\*</sup>, Ganugapati Sai Srivatsa Kumar<sup>b</sup>, Venkatraman Ravi<sup>c</sup>, Nagalingam Ravi Sundaresan<sup>c</sup> and Giridhar Madras<sup>a</sup>*

*<sup>a</sup>Dept. of Chemical Engineering, Indian Institute of Science, Bangalore 560012, India.*

*<sup>b</sup>Dept. of Chemical Engineering, R.V. College of Engineering, Bangalore 560059, India.*

*<sup>c</sup>Dept. of Microbiology and Cell Biology, Indian Institute of Science, Bangalore 560012, India.*

*E-mail: krisgokul86@gmail.com; Fax: +91 80 23600683; Tel: +91 80 22932321*

## **2. Materials and Methods**

### *2.1 Chemicals:*

Iron(III) sulphate hydrate, Citric acid, Oxalic acid and Potassium dichromate were purchased from Merck. 1, 10 Phenanthroline, Potassium Saccharate and Diphenylcarbazide were purchased from Sigma-Aldrich. Humic acid, Sodium acetate trihydrate, Sodium chloride, Sodium sulfate, Sodium hydrogen carbonate, Sodium hydroxide, and Humic acid were purchased from S.D Fine Chemicals Ltd., India. All the chemicals used were of guaranteed analytical grade. All the solutions, buffers and aqueous reagents were freshly prepared with deionized water (resistivity 18.21 M $\Omega$ .cm) from the Millipore system.

### *2.3 Cyclic voltammetry:*

Electrochemical experiments were performed with potentiostat PG16125 (Techno Science Instruments) in a three-electrode system including a saturated calomel electrode (SCE), a platinum counter electrode and a glassy carbon working electrode. The glassy carbon electrode was polished well using alumina slurry (0.3 and 0.03  $\mu$ M), rinsed with isopropanol and distilled water followed by a sonication for a minute. 5 mM KCl was used as a supporting electrolyte. Before each scan, the sample solutions were purged with argon for 30 min to remove dissolved oxygen. Voltagrams were recorded at a scan rate of 5 mV s<sup>-1</sup>.

### *2.4 Cell culture and MTT assay:*

HeLa cells were obtained from National Centre for Cell Science (NCCS), Pune, India. The cells were cultured according to standard protocols (Hou et al. 2017, Sundaresan et al. 2008, Wang et al. 2016b). Briefly, the cells were grown on standard tissue culture polystyrene dishes using a regular high glucose Dulbeccos Modified Eagles Medium (DMEM) supplemented with 10% fetal bovine serum (FBS) and antibiotic- antimycotic mix. The cells were sub-cultured regularly at 80% confluence. For MTT assay the cells were seeded in 96 well plates and the cells were allowed to attach for 24 hrs. The cells were then incubated for 24 hours with (i)

Cr(VI) 200  $\mu$ M (ii) Cr(VI) 200  $\mu$ M treated with Fe(III)(50  $\mu$ M) /UVC system for 30 min and (iii) Cr(VI) 200  $\mu$ M treated with Fe(III)(50  $\mu$ M) /SA (300  $\mu$ M)/UVC system for 30 min. The cells were then incubated with 0.5 mg/l MTT (Sigma) dissolved in DMEM for 2 hrs. The resulting blue precipitate was dissolved in DMSO and the absorbance at 570 nm wavelength was recorded using a standard 96 well plate reader (Tecan). The % cell viability was calculated relative to the control cells. The data are represented as Mean  $\pm$  SD from 3 independent samples,  $p < 0.01$ .

### 2.5 Confocal microscopy:

Confocal microscopy was carried out using standard procedures as described in our previous work (Jain et al. 2017). Briefly, HeLa cells were grown on sterilized glass cover slips and the above mentioned treatments were carried out 24 h after seeding. Post treatment, the cells were washed twice with Phosphate buffered saline (PBS) and fixed with 4 % formaldehyde for 15 min. The cells were then permeabilized with 0.2% Triton X-100 for 5 min. Blocking was carried out using a blocking solution (5 % BSA dissolved in PBS) for 1 h at room temperature. The cells were then incubated overnight at 4 $^{\circ}$  C with  $\gamma$ -H2AX (Cell signalling 9718) antibody dissolved in blocking solution at a dilution of 1:300. The cells were then washed with PBS and incubated with secondary antibody (Rabbit secondary conjugated with Alexa Fluor 546 fluorophore, Thermo) at a dilution of 1:500 in blocking solution for 1 hr at room temperature. Finally, the cells were washed with PBS and the nuclei were stained with Hoechst 33342 and were mounted on clean glass slides using the DPX mountant solution. The images were acquired using the LSM 710 confocal microscope and images were processed out using the Zen Lite software. The pie chart representing the percentage of nuclei displaying  $\gamma$ H2AX foci was realized from the image.

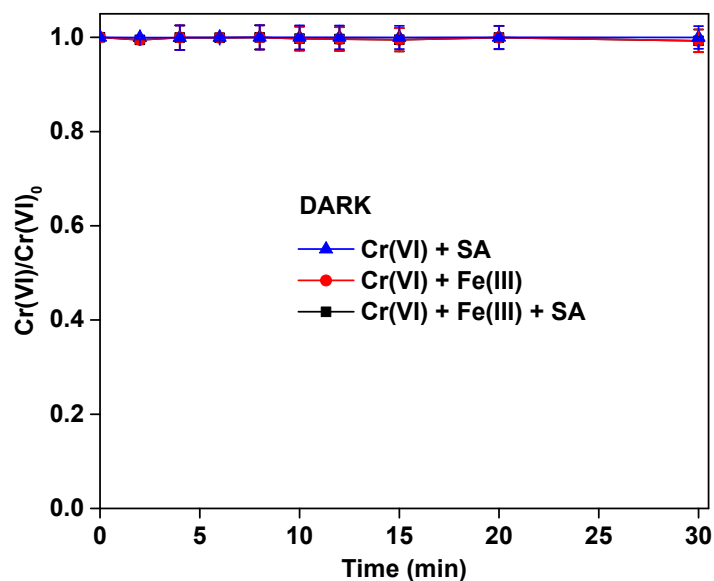

**Fig. S1.** Reduction of Cr(VI) as function of time by SA, Fe(III), and Fe(III)/SA in dark [Fe(III)] = 50  $\mu$ M; [Cr(VI)] = 200  $\mu$ M; [SA] = 300  $\mu$ M; pH 3.

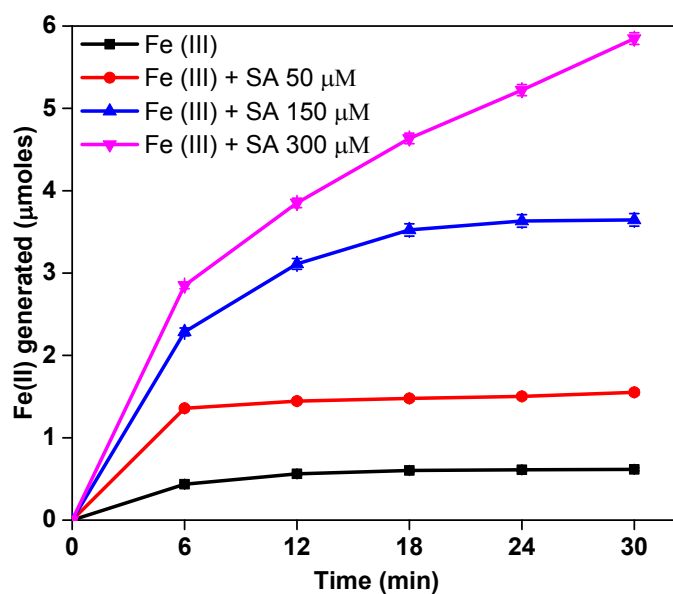

**Fig. S2.** Moles of Fe(II) generated upon photolysis of Fe(III) in presence of increasing concentration of SA. [Fe(III)] = 50  $\mu$ M. Irradiance@254 nm = 0.33 mW  $\text{cm}^{-2}$

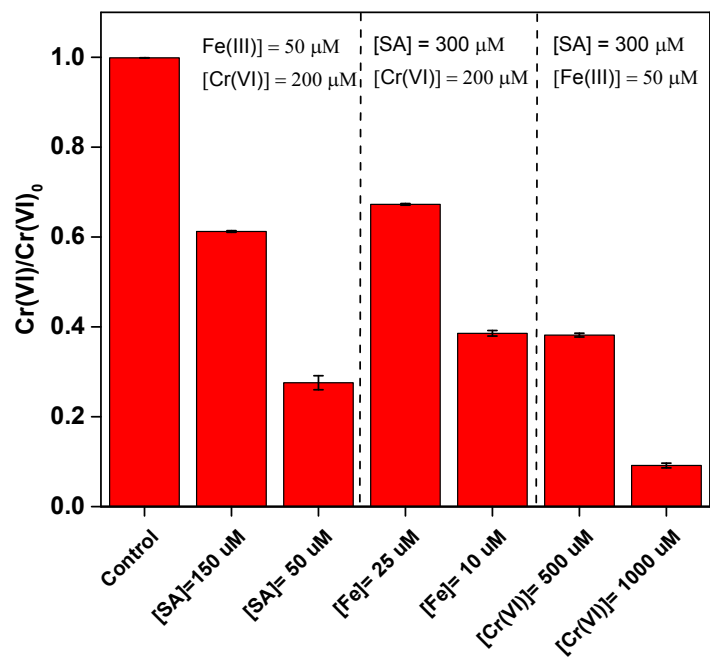

**Fig. S3.** Effect of initial concentration of Fe(III), SA and Cr (VI) on Cr(VI) photoreduction by Fe(III)/SA/UVC system. Treatment time – 30 Irradiance@254 nm = 0.33 mW cm<sup>-2</sup>

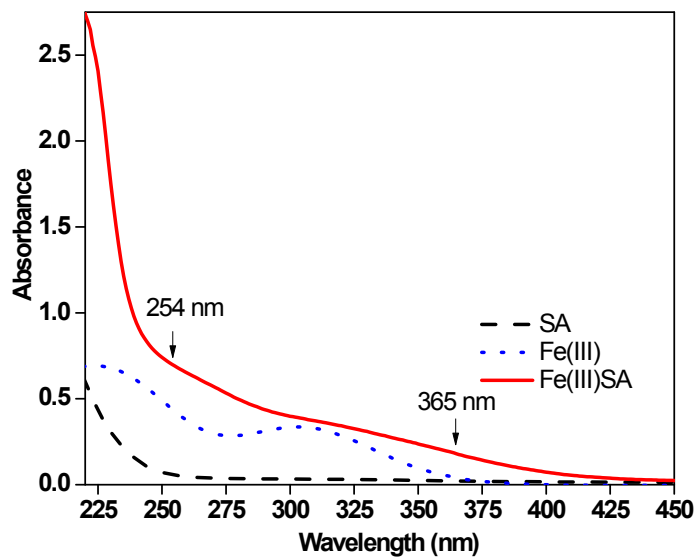

**Fig. S4.** UV-Visible absorption spectra of Fe(III) (150 μM), SA (2.5 mM) and Fe(III)SA (150 μM).

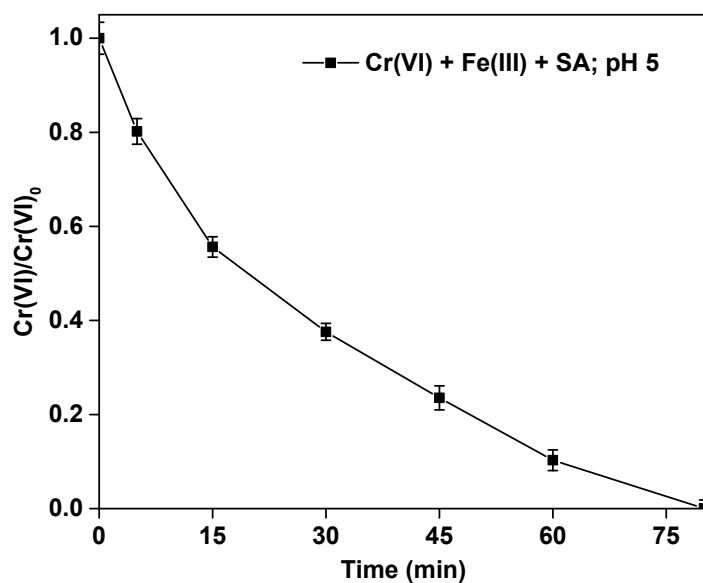

**Fig. S5.** Reduction of Cr(VI) as function of time by Fe(III)/SA/UVC system at pH 5. [Fe(III)] = 50  $\mu\text{M}$ ; [Cr(VI)] = 200  $\mu\text{M}$ ; [SA] = 300  $\mu\text{M}$ ; pH 3; Irradiance at 254 nm = 0.33  $\text{mW cm}^{-2}$

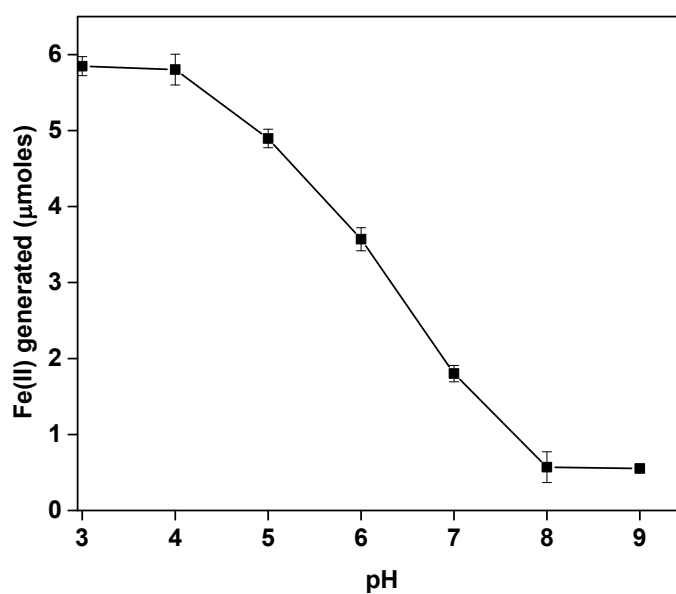

**Fig. S6.** Moles of Fe(II) generated upon photolysis of Fe(III) in presence of SA as function of pH. [Fe(III)] = 50  $\mu\text{M}$ ; [SA] = 300  $\mu\text{M}$ ; Irradiance@254 nm = 0.33  $\text{mW cm}^{-2}$

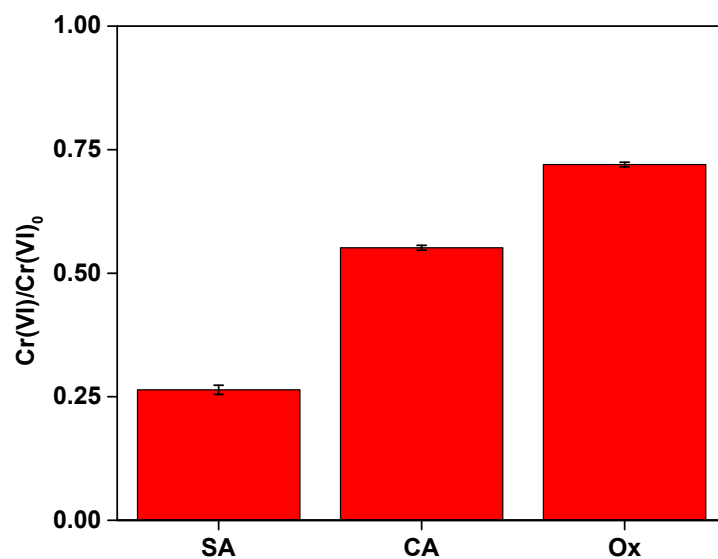

**Fig. S7.** Reduction of Cr(VI) by Fe(III)/SA/UVC, Fe(III)/CA/UVC and Fe(III)/Ox/UVC system. Treatment time = 15 min.  $[\text{Fe(III)}] = 50 \mu\text{M}$ ;  $[\text{Cr(VI)}] = 200 \mu\text{M}$ ;  $[\text{L}] = 300 \mu\text{M}$ ; pH 3; Irradiance at 254 nm =  $0.33 \text{ mW cm}^{-2}$

**Table S 1. Water quality parameters of raw water samples:**

| <b>Parameters</b>                           | <b>Method</b>       | <b>Ground Water</b>   | <b>Sankey Lake Sample</b> |
|---------------------------------------------|---------------------|-----------------------|---------------------------|
| <b>Chemical Oxygen Demand (C.O.D)</b>       | IS:3025(P-58)2006   | 4.5 ppm               | 76.8 ppm                  |
| <b>Biological oxygen demand (BOD)</b>       | IS:3025(P-44)1993   | Below Detection limit | 26 ppm                    |
| <b>Total Organic Carbon (TOC)</b>           | ISO 8245:1999(E)    | 1.7 ppm               | 20.5 ppm                  |
| <b>pH</b>                                   | pH meter            | 6.1 ± 0.1             | 7.4 ± 0.3                 |
| <b>Sulphate, as SO<sub>4</sub></b>          | IS:3025 & APHA      | 11.92 ppm             | 19.56 ppm                 |
| <b>Nitrate (as NO<sub>3</sub>)</b>          | IS:3025 & APHA      | 4.20 ppm              | 15.53 ppm                 |
| <b>Chloride (as Cl)</b>                     | IS:3025 & APHA      | 61.11 ppm             | 63.05 ppm                 |
| <b>Phosphate (as PO<sub>4</sub>)</b>        | IS:3025 (P-31) 2009 | 2 ppm                 | 2.02 ppm                  |
| <b>Total Hardness (as CaCO<sub>3</sub>)</b> | IS:3025 (P-21) 2009 | 141.25 ppm            | 167.13 ppm                |
| <b>Total Dissolved Solids (mg/L)</b>        | IS:3025(P-16)-1984  | 336 ppm               | 586 ppm                   |
| <b>Total Suspended Solids</b>               | IS:3025 (P-17) 1984 | Absent                | 39 ppm                    |

**Table S 2. Composition of simulated galvanic waste water:**

| <b>Parameters</b>              | <b>Values</b>         |
|--------------------------------|-----------------------|
| Chemical Oxygen Demand (C.O.D) | 6.2 ppm               |
| Biological oxygen demand (BOD) | Below detection limit |
| Total Organic Carbon (TOC)     | 3.5 ppm               |
| Total Chromium                 | 10 mg L <sup>-1</sup> |
| Humic Acid                     | 3 ppm                 |
| Sodium                         | 90 mg L <sup>-1</sup> |
| Magnesium                      | 10 mg L <sup>-1</sup> |
| Potassium                      | 66 mg L <sup>-1</sup> |
| Fluoride                       | 1 mg L <sup>-1</sup>  |
| Chloride                       | 30 mg L <sup>-1</sup> |
| Nitrite                        | 2 mg L <sup>-1</sup>  |
| Nitrate                        | 25 L <sup>-1</sup>    |
| Zinc                           | 5 mg L <sup>-1</sup>  |
| Aluminium                      | 5 mg L <sup>-1</sup>  |
| Nickel                         | 5 mg L <sup>-1</sup>  |
| Copper                         | 5 mg L <sup>-1</sup>  |



## References:

1. Hou, C., Lu, G., Zhao, L., Yin, P. and Zhu, L. (2017) Estrogenicity assessment of membrane concentrates from landfill leachate treated by the UV-Fenton process using a human breast carcinoma cell line. *Chemosphere* 180, 192-200.
2. Jain, A., Ravi, V., Muhamed, J., Chatterjee, K. and Sundaresan, N.R. (2017) A simplified protocol for culture of murine neonatal cardiomyocytes on nanoscale keratin coated surfaces. *International journal of cardiology* 232, 160-170.
3. Sundaresan, N.R., Samant, S.A., Pillai, V.B., Rajamohan, S.B. and Gupta, M.P. (2008) SIRT3 is a stress-responsive deacetylase in cardiomyocytes that protects cells from stress-mediated cell death by deacetylation of Ku70. *Molecular and cellular biology* 28(20), 6384-6401.
4. Wang, G., Lu, G., Yin, P., Zhao, L. and Yu, Q.J. (2016b) Genotoxicity assessment of membrane concentrates of landfill leachate treated with Fenton reagent and UV-Fenton reagent using human hepatoma cell line. *Journal of hazardous materials* 307, 154-162.
